# Supplementary material for: A Deep Learning Framework for the Detection of Abnormality in Cerebral Blood Flow Velocity Using Transcranial Doppler Ultrasound
Source: MDPI journal article supplement (doi:10.3390/diagnostics13122000), 2023-06-08
Supplement: s1 [file s1]

Supplementary Materials

Self-ResNet18\_Q1 Model

Table S1: Fold-wise learning curves of the Self-ResNet18\_Q1 model

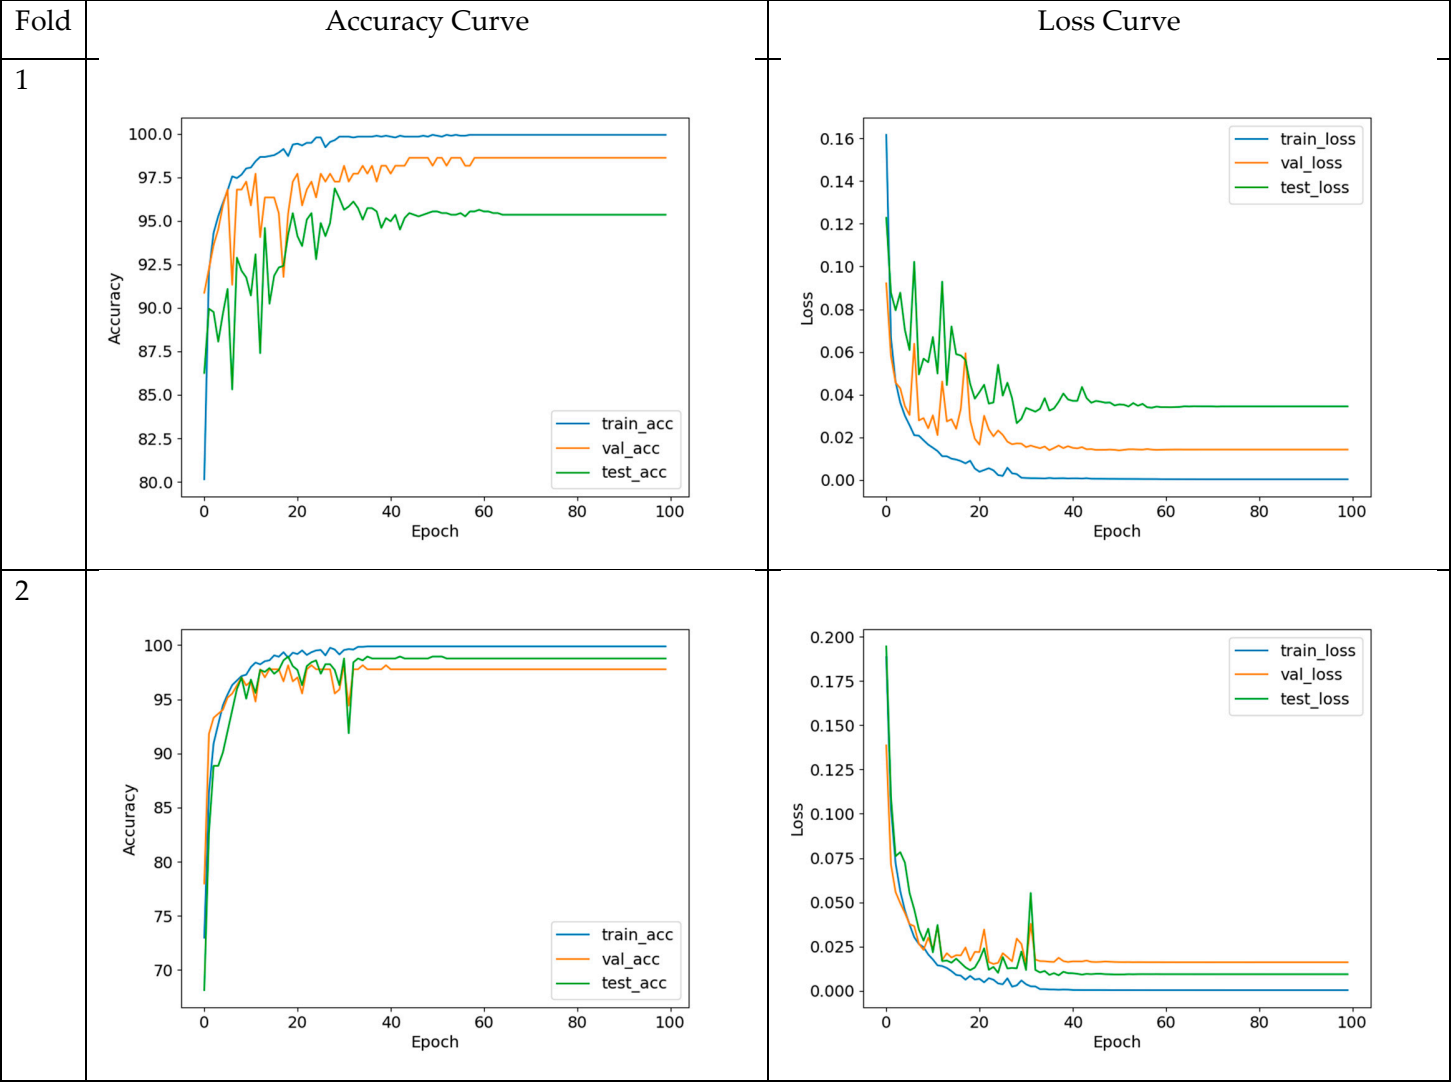

3

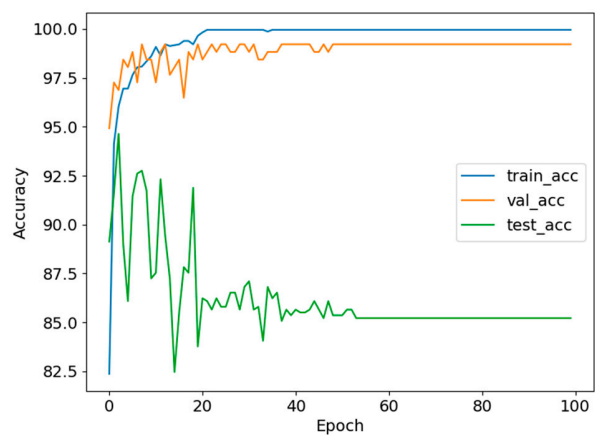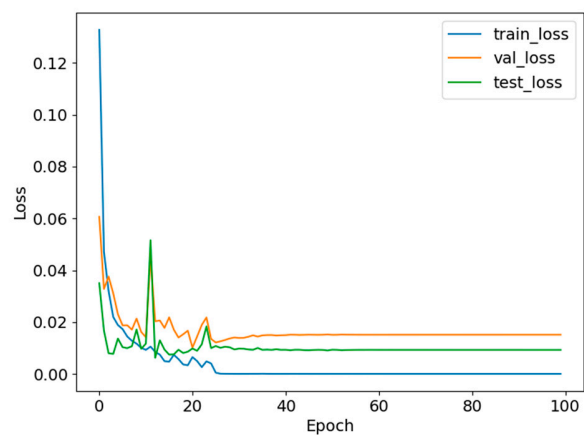

4

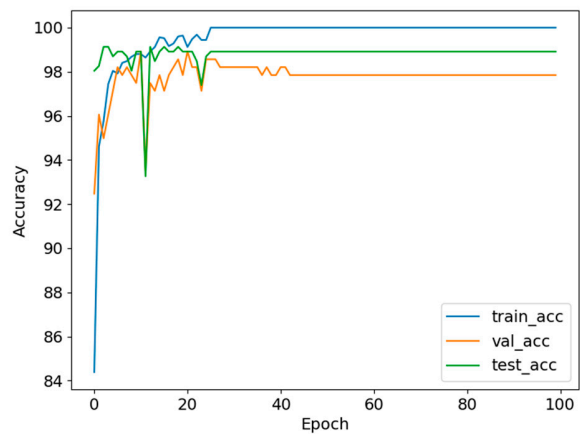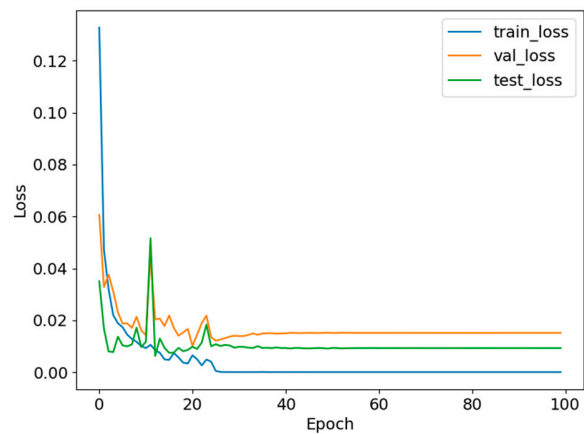

5

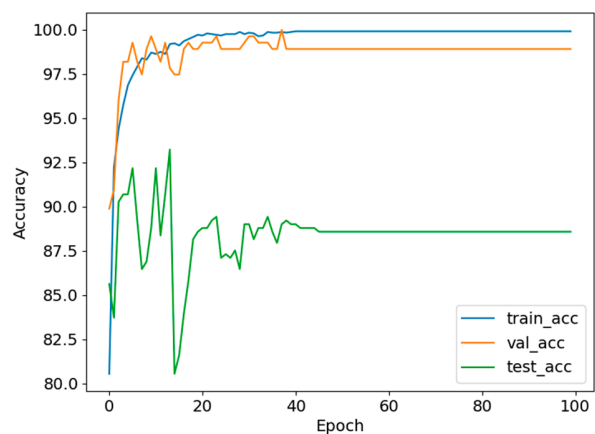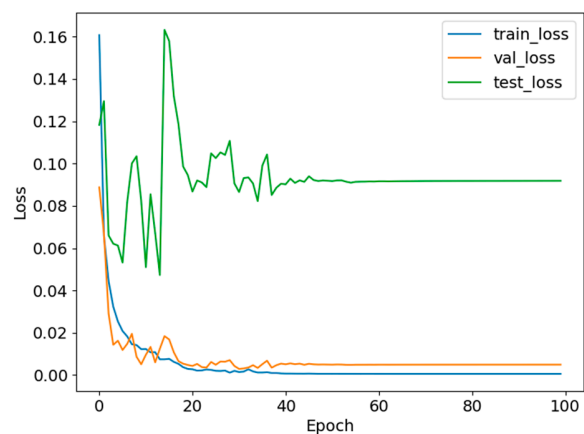

The confusion matrix of Self-ResNet18\_Q1 model is given in Figure 1.

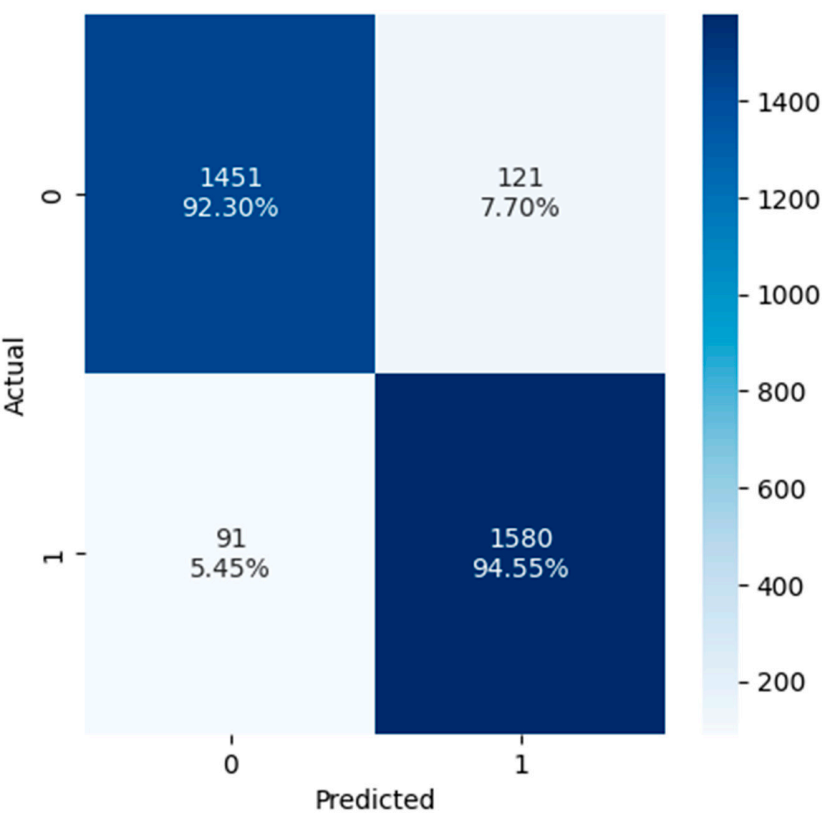

Figure S1: Confusion matrix for Self-ResNet18\_Q1 model

The Receiver operator characteristics (ROC) curve of Self-ResNet18\_Q1 model is given in Figure 2 below.

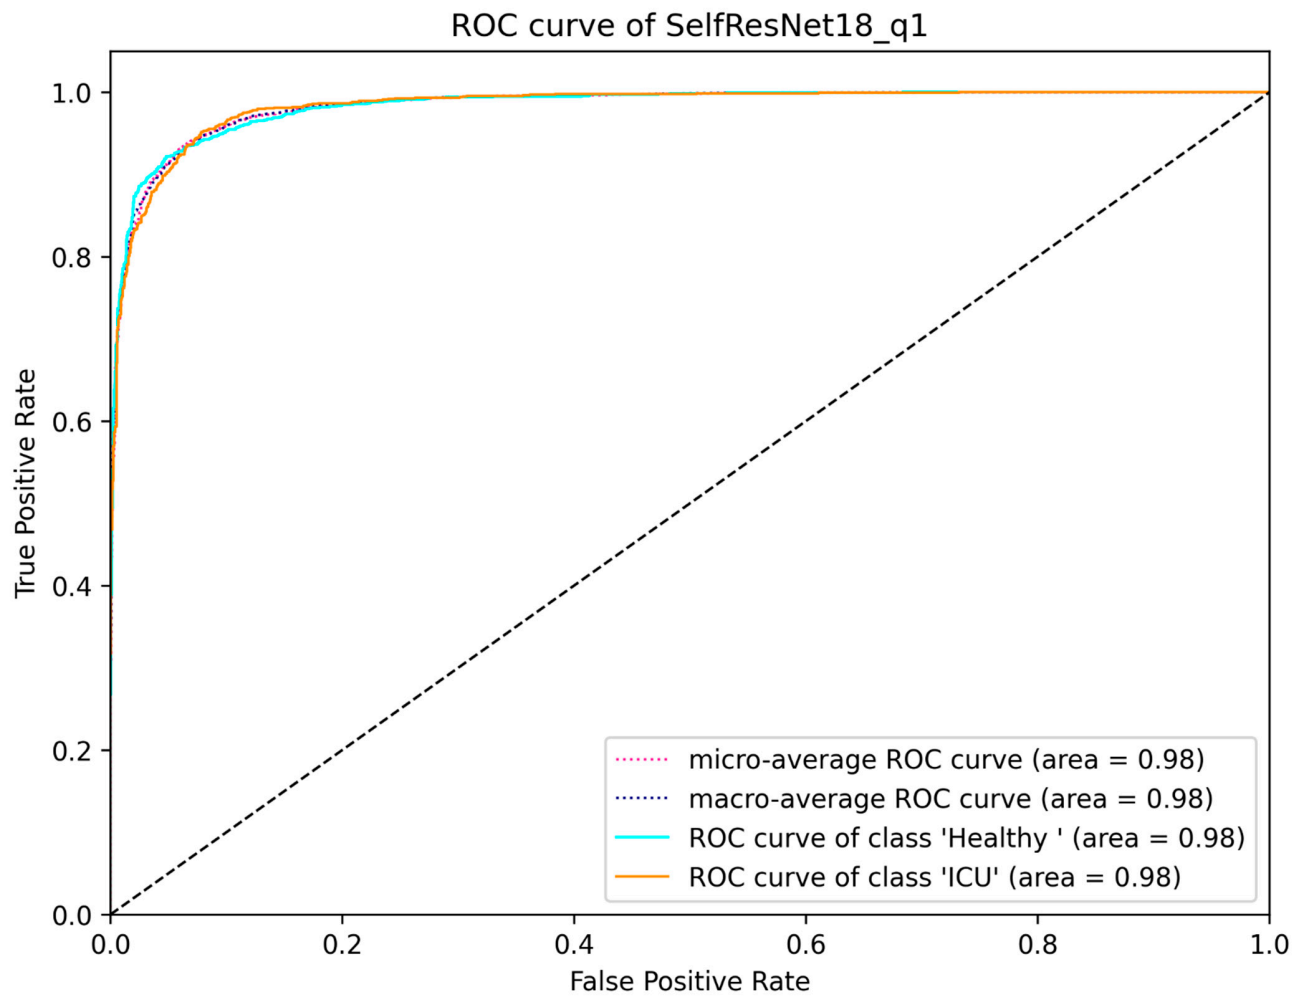

Figure S2: ROC curve of Self-ResNet18\_Q1 model

Self-ResNet18\_Q3 Model

Table S2: Fold-wise learning curves of the Self-ResNet18\_Q3 model

| Fold | Accuracy Curve                                                                      | Loss Curve                                                                           |
|------|-------------------------------------------------------------------------------------|--------------------------------------------------------------------------------------|
| 1    | 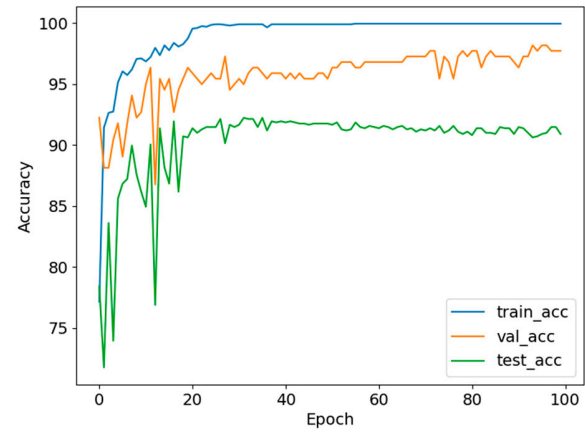   |    |
| 2    |  |  |
| 3    |  |  |

4

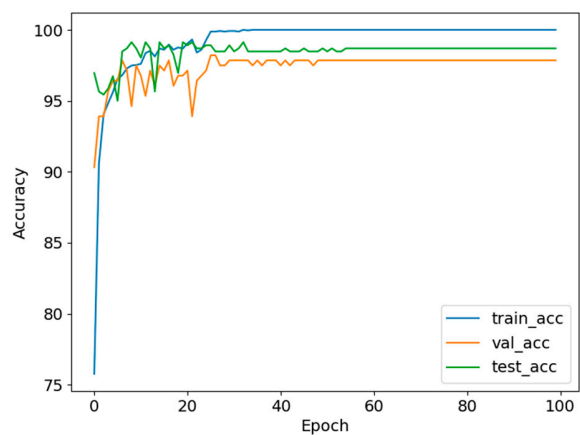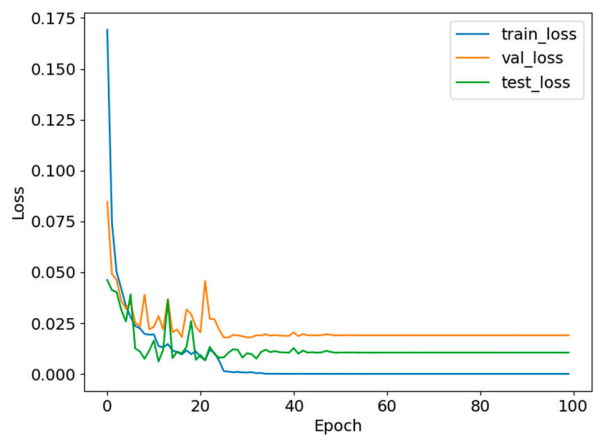

5

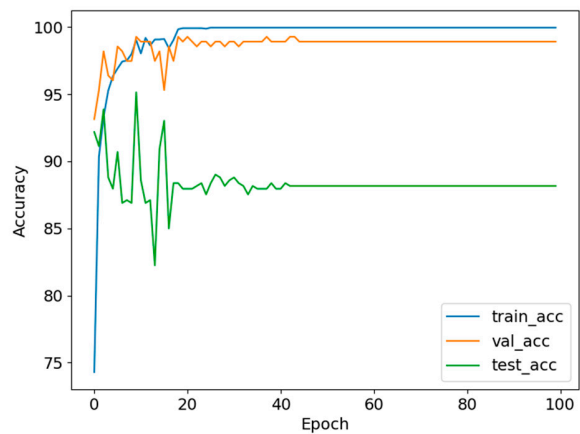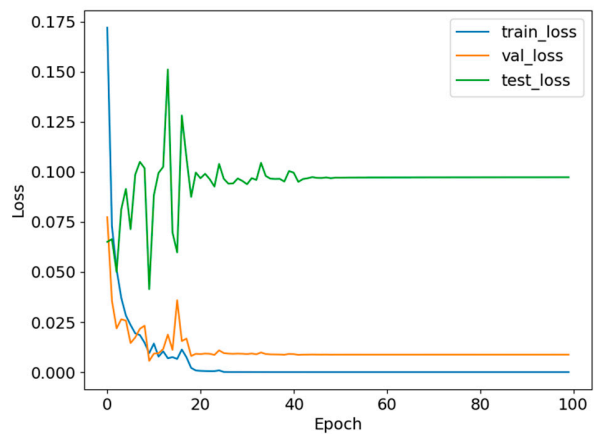

The confusion matrix of Self-ResNet18\_Q3 model is given in Figure 3.

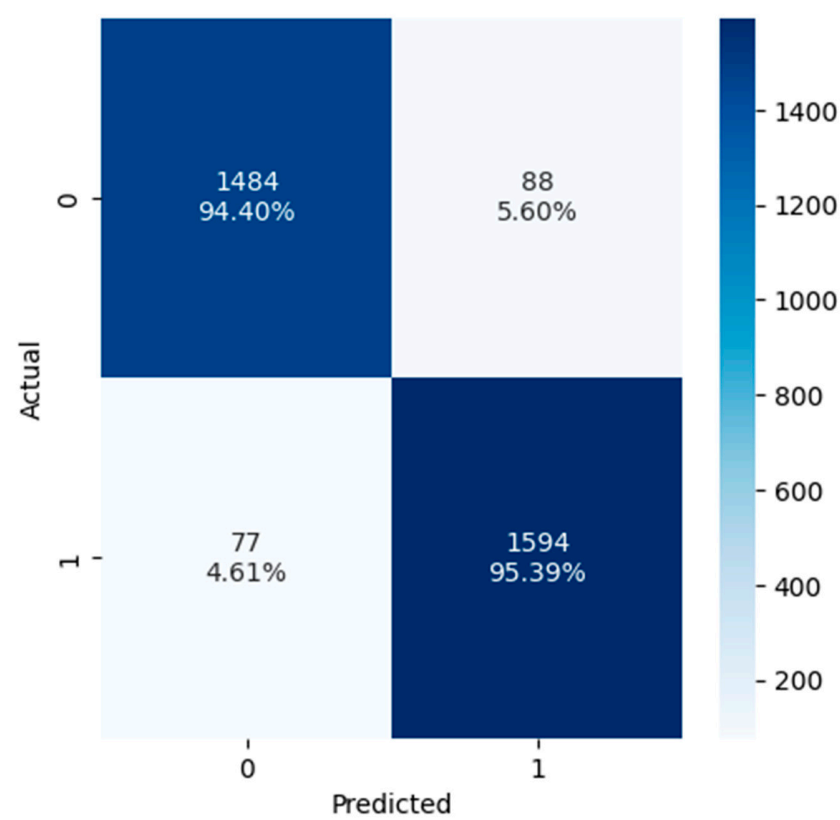

Figure S3: Confusion matrix for Self-ResNet18\_Q3 model

The Receiver operator characteristics (ROC) curve of Self-ResNet18\_Q3 model is given in Figure 4 below.

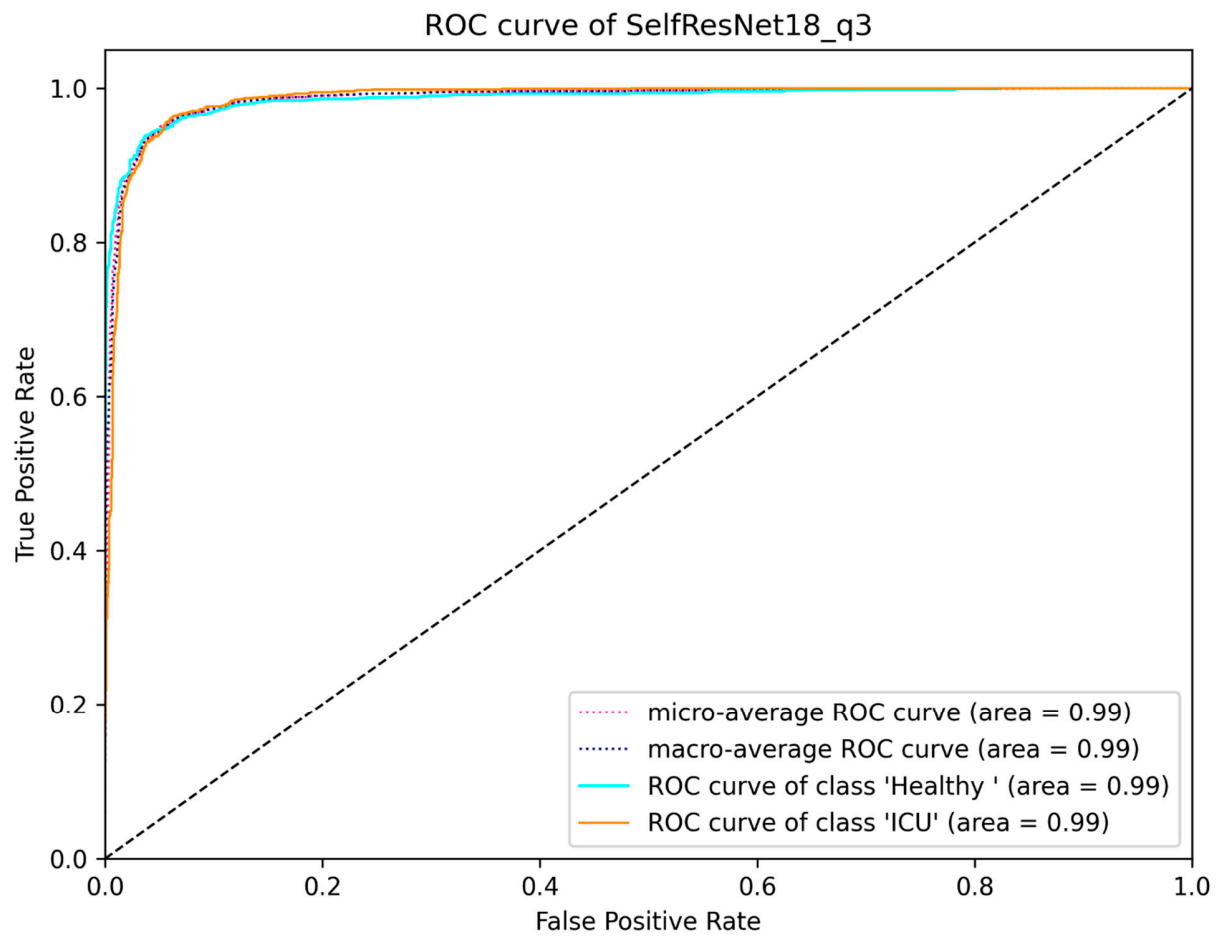

Figure S4: ROC curve of Self-ResNet18\_Q3 model



Self-ResNet18\_Q5 Model

Table S3: Fold-wise learning curves of the Self-ResNet18\_Q5 model

| Fold | Accuracy Curve                                                                      | Loss Curve                                                                           |
|------|-------------------------------------------------------------------------------------|--------------------------------------------------------------------------------------|
| 1    | 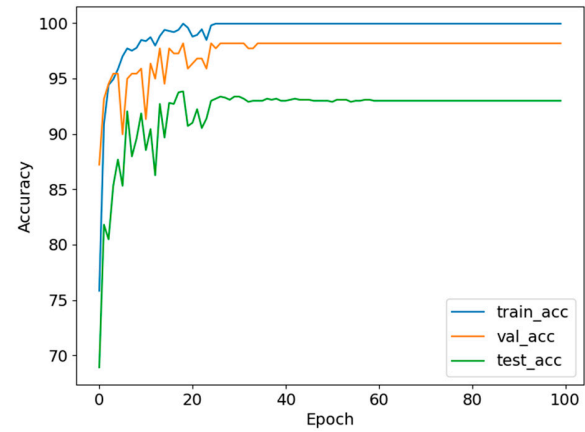   |    |
| 2    |  |  |
| 3    |  |  |

4

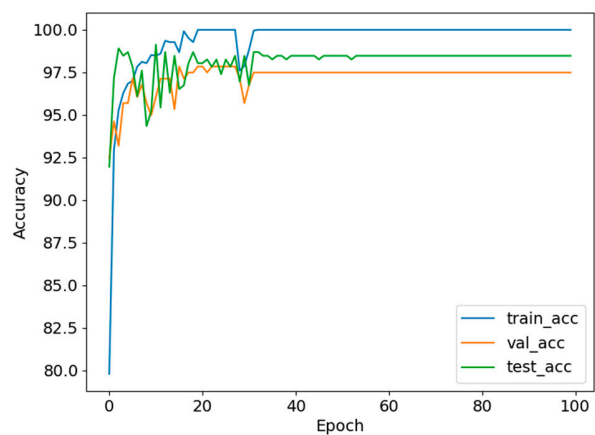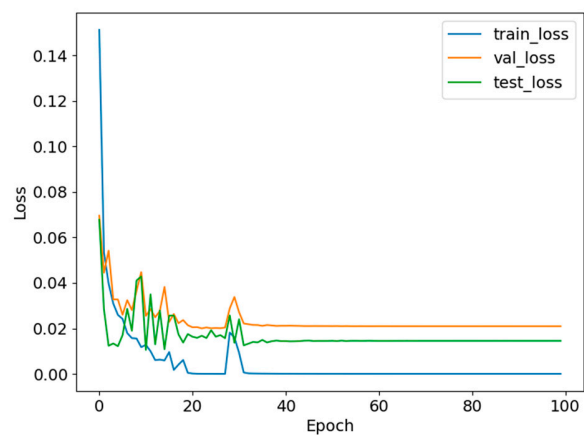

5

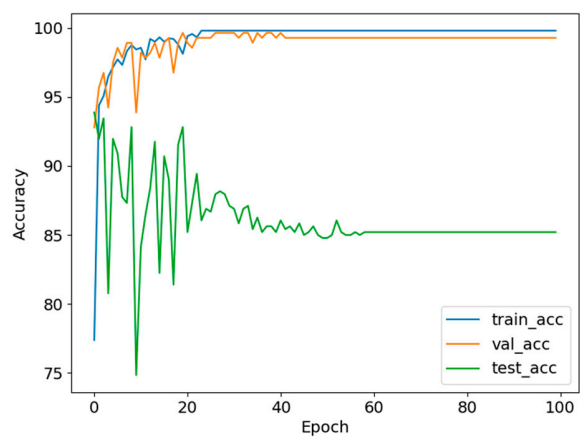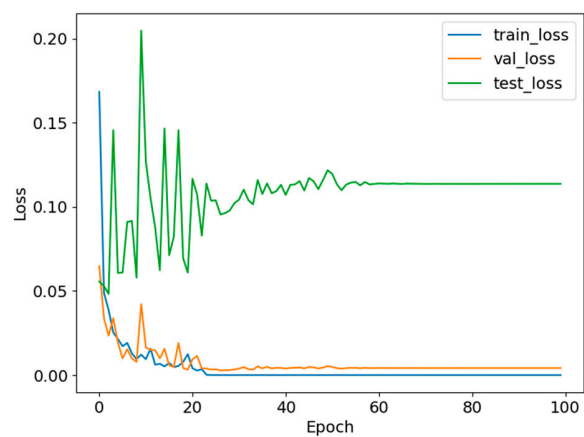

The confusion matrix of Self-ResNet18\_Q5 model is given in Figure 5.

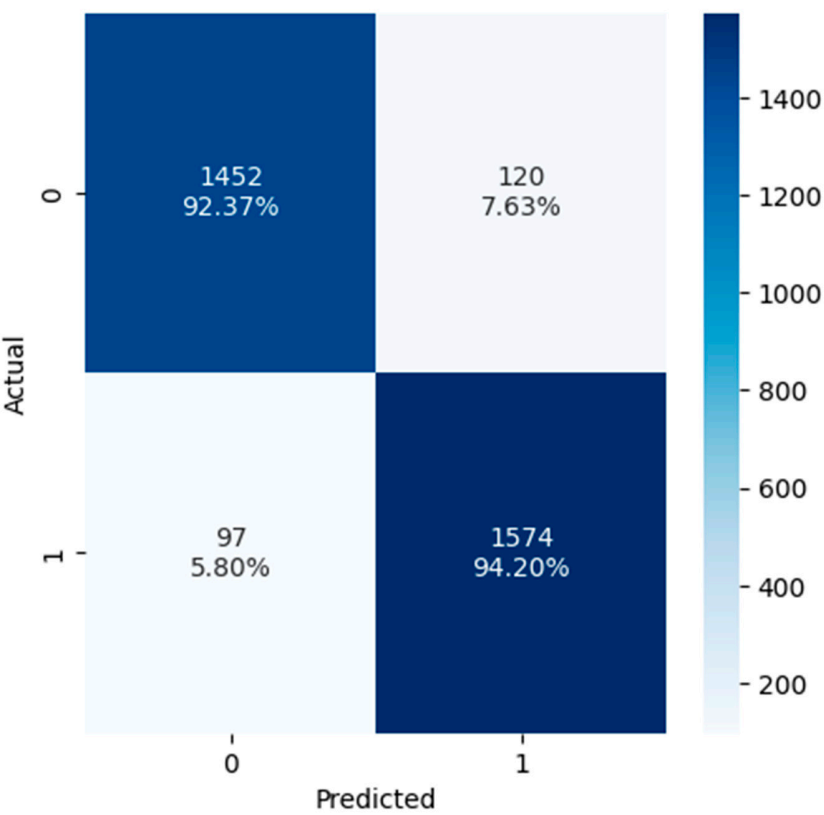

Figure S5: Confusion matrix of Self-ResNet18\_Q5 model

The ROC curve of Self-ResNet18\_Q5 model is given in Figure 6 below.

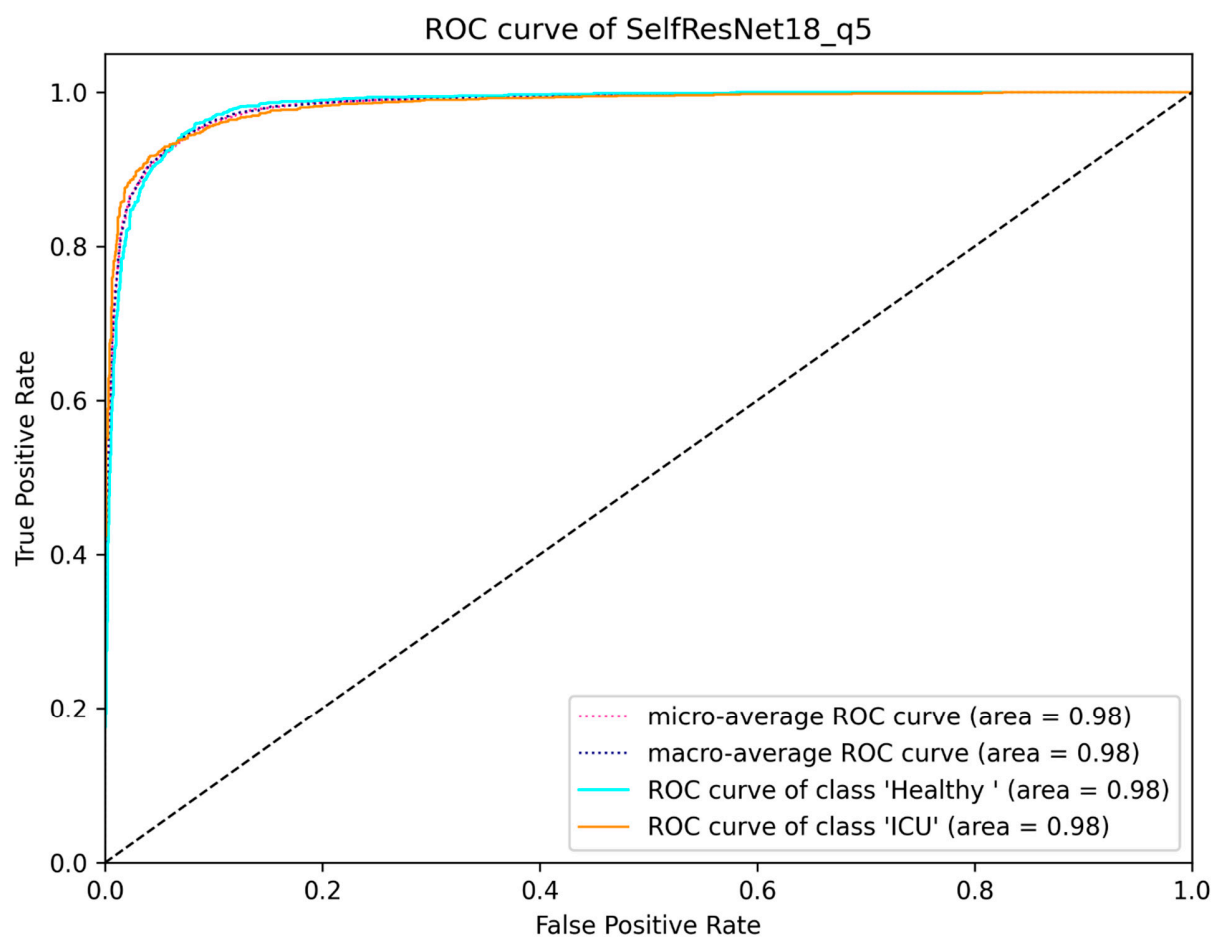

Figure S6: ROC curve of Self-ResNet18\_Q5 model

Self-ResAttentionNet18\_Q1 Model

Table S4: Fold-wise learning curves of the Self-ResAttentionNet18\_Q1 model

| Fold | Accuracy Curve                                                                      | Loss Curve                                                                           |
|------|-------------------------------------------------------------------------------------|--------------------------------------------------------------------------------------|
| 1    | 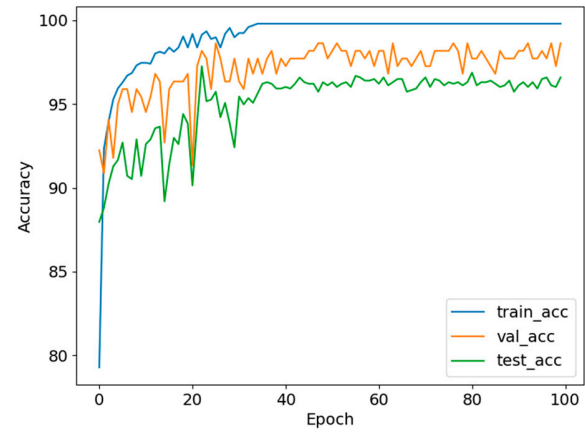   |    |
| 2    |  |  |
| 3    |  |  |

4

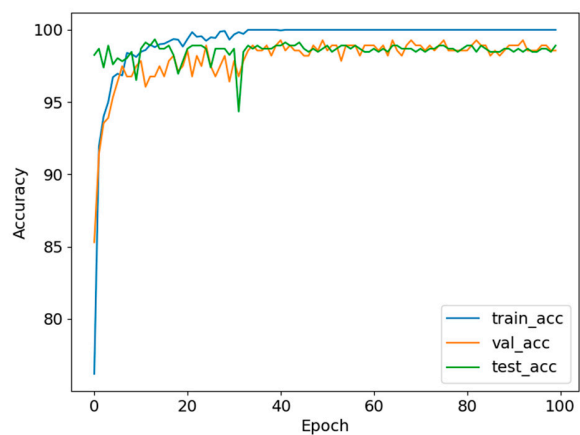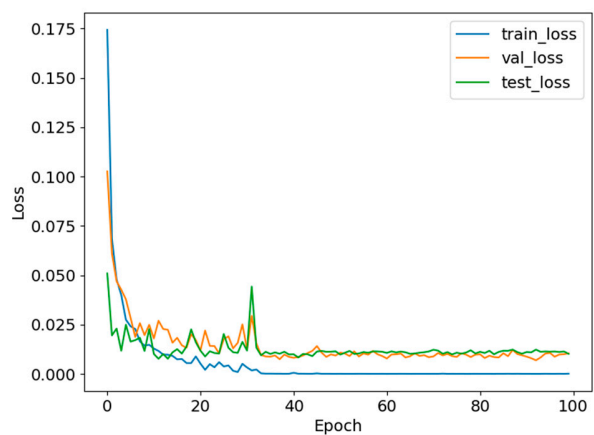

5

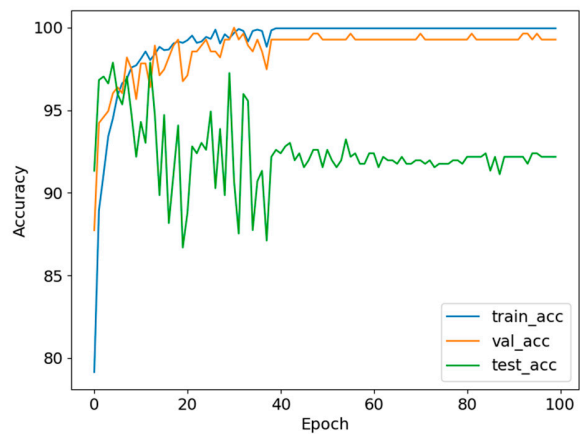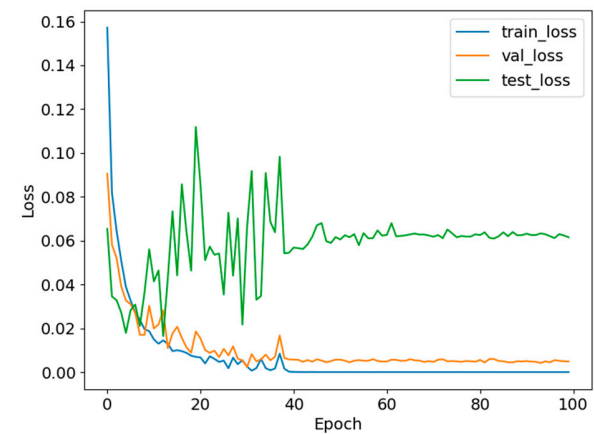

The confusion matrix of Self-ResAttentionNet18\_Q1 model is given in Figure 7.

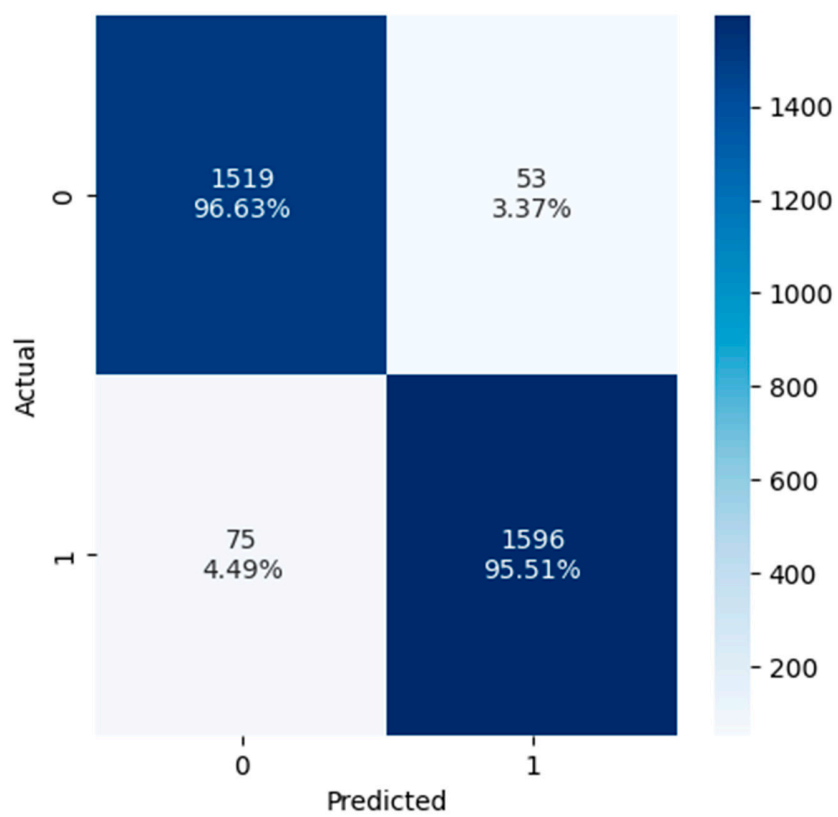

Figure S7: Confusion matrix of Self-ResAttentionNet18\_Q1 model

The ROC curve of Self-ResAttentionNet18\_Q1 model is given in Figure 8 below.

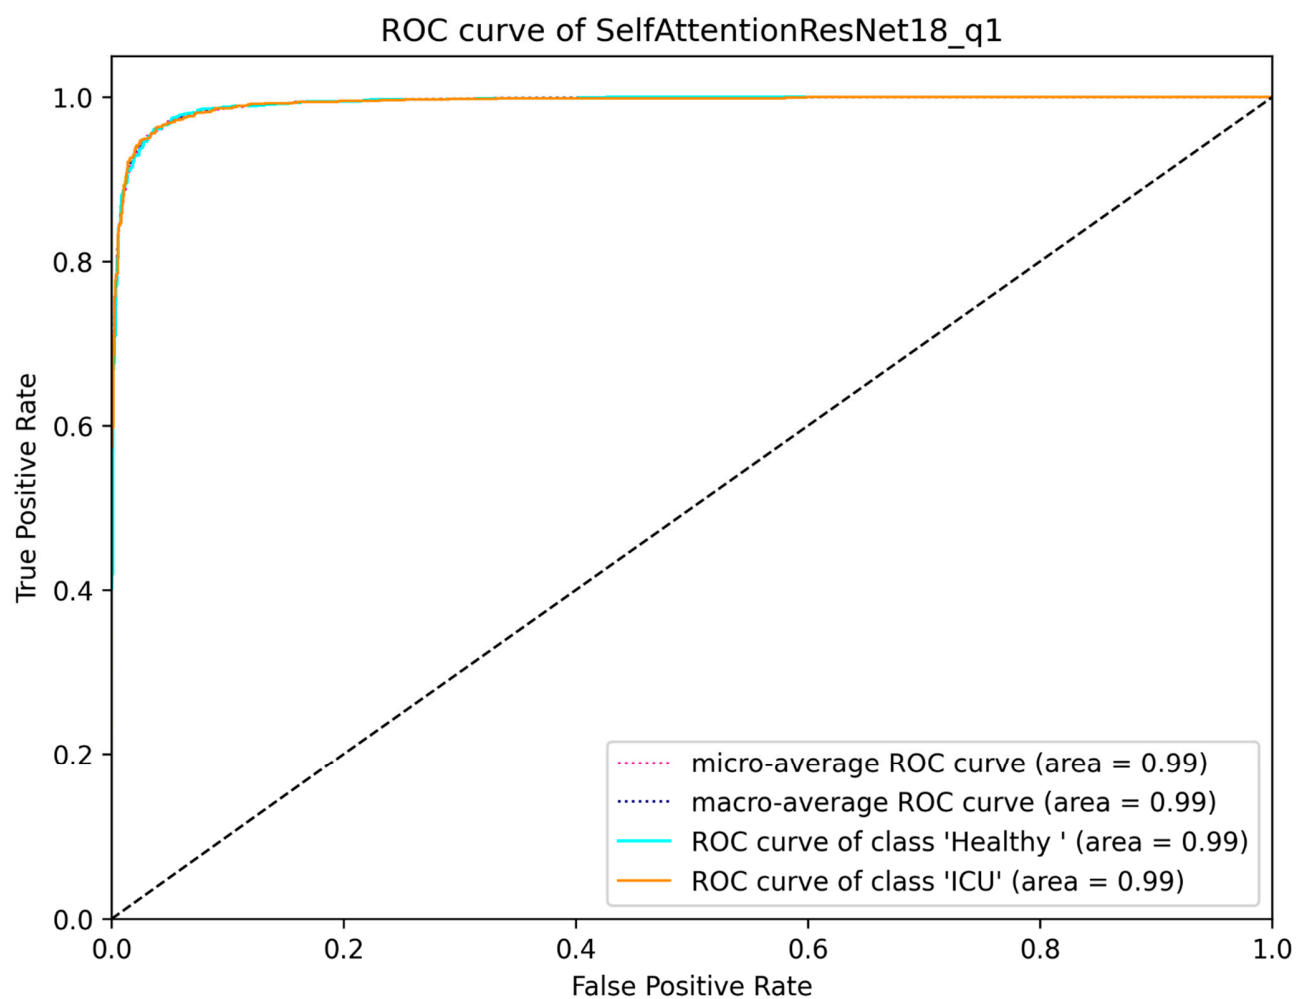

Figure S8: ROC curve of Self-ResAttentionNet18\_Q1 model



Self-ResAttentionNet18\_Q3 Model

Table S5: Fold-wise learning curves of the Self-ResAttentionNet18\_Q3 model

| Fold | Accuracy Curve                                                                                                                                                                                                                                                                                                                                                                                                                                                                                                                                                       | Loss Curve                                                                                                                                                                                                                                                                                                                                                                                                                                                                                                                                                                                               |
|------|----------------------------------------------------------------------------------------------------------------------------------------------------------------------------------------------------------------------------------------------------------------------------------------------------------------------------------------------------------------------------------------------------------------------------------------------------------------------------------------------------------------------------------------------------------------------|----------------------------------------------------------------------------------------------------------------------------------------------------------------------------------------------------------------------------------------------------------------------------------------------------------------------------------------------------------------------------------------------------------------------------------------------------------------------------------------------------------------------------------------------------------------------------------------------------------|
| 1    | 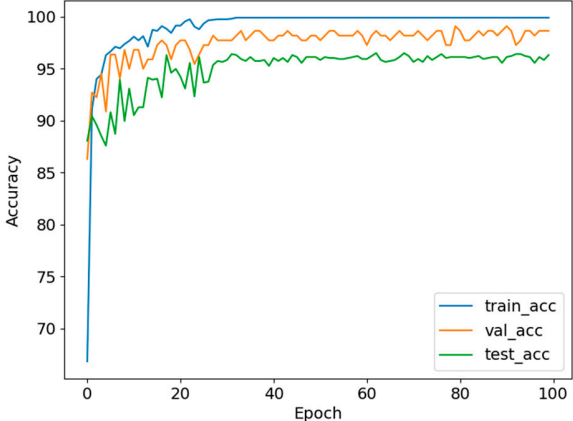 <p>This plot shows the accuracy of the model over 100 epochs for Fold 1. The x-axis is 'Epoch' (0 to 100) and the y-axis is 'Accuracy' (70 to 100). Three lines are plotted: train_acc (blue), val_acc (orange), and test_acc (green). All three curves start at approximately 70% accuracy at epoch 0. They all rise sharply, reaching a plateau around epoch 20. train_acc reaches nearly 100%, val_acc reaches approximately 98%, and test_acc reaches approximately 96%.</p>   |  <p>This plot shows the loss of the model over 100 epochs for Fold 1. The x-axis is 'Epoch' (0 to 100) and the y-axis is 'Loss' (0.00 to 0.20). Three lines are plotted: train_loss (blue), val_loss (orange), and test_loss (green). All three curves start at high loss values (train_loss ~0.22, val_loss ~0.13, test_loss ~0.13) and decrease rapidly, reaching a plateau around epoch 20. train_loss drops to near 0.00, val_loss drops to approximately 0.02, and test_loss drops to approximately 0.03.</p>     |
| 2    |  <p>This plot shows the accuracy of the model over 100 epochs for Fold 2. The x-axis is 'Epoch' (0 to 100) and the y-axis is 'Accuracy' (75 to 100). Three lines are plotted: train_acc (blue), val_acc (orange), and test_acc (green). All three curves start at approximately 75% accuracy at epoch 0. They all rise sharply, reaching a plateau around epoch 20. train_acc reaches nearly 100%, val_acc reaches approximately 98%, and test_acc reaches approximately 97%.</p> |  <p>This plot shows the loss of the model over 100 epochs for Fold 2. The x-axis is 'Epoch' (0 to 100) and the y-axis is 'Loss' (0.000 to 0.175). Three lines are plotted: train_loss (blue), val_loss (orange), and test_loss (green). All three curves start at high loss values (train_loss ~0.17, val_loss ~0.13, test_loss ~0.13) and decrease rapidly, reaching a plateau around epoch 20. train_loss drops to near 0.00, val_loss drops to approximately 0.01, and test_loss drops to approximately 0.02.</p> |
| 3    |  <p>This plot shows the accuracy of the model over 100 epochs for Fold 3. The x-axis is 'Epoch' (0 to 100) and the y-axis is 'Accuracy' (75 to 100). Three lines are plotted: train_acc (blue), val_acc (orange), and test_acc (green). All three curves start at approximately 75% accuracy at epoch 0. They all rise sharply, reaching a plateau around epoch 20. train_acc reaches nearly 100%, val_acc reaches approximately 98%, and test_acc reaches approximately 93%.</p> |  <p>This plot shows the loss of the model over 100 epochs for Fold 3. The x-axis is 'Epoch' (0 to 100) and the y-axis is 'Loss' (0.00 to 0.16). Three lines are plotted: train_loss (blue), val_loss (orange), and test_loss (green). All three curves start at high loss values (train_loss ~0.16, val_loss ~0.13, test_loss ~0.13) and decrease rapidly, reaching a plateau around epoch 20. train_loss drops to near 0.00, val_loss drops to approximately 0.01, and test_loss drops to approximately 0.06.</p>   |

4

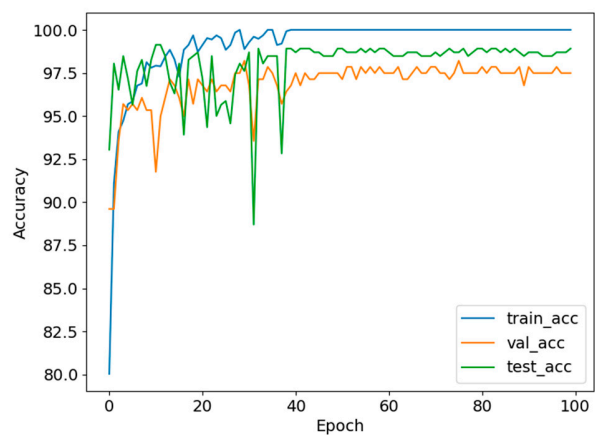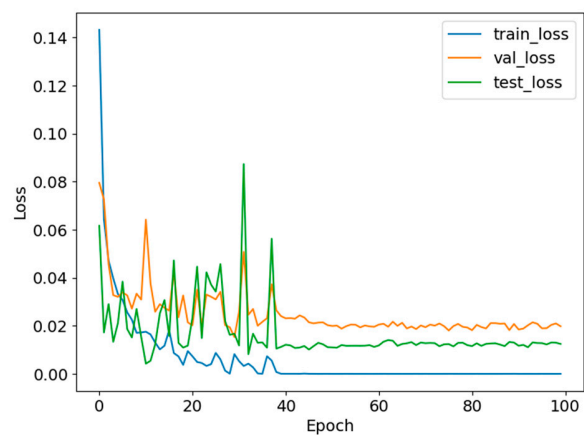

5

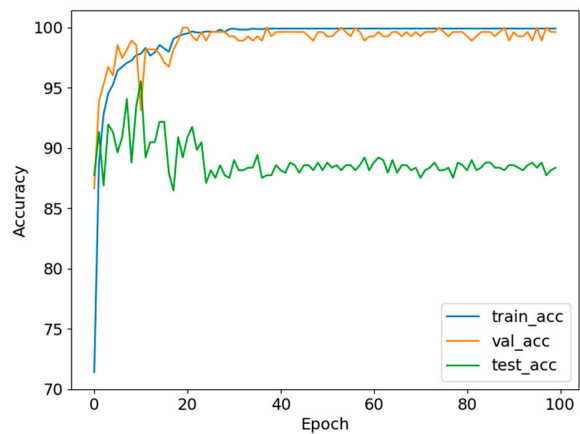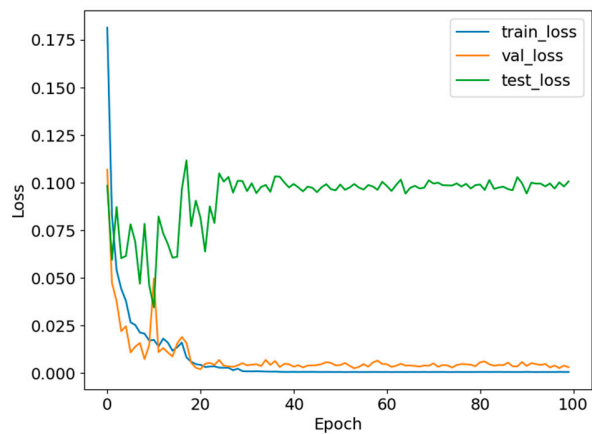

The confusion matrix of Self-ResAttentionNet18\_Q3 model is given in Figure 9.

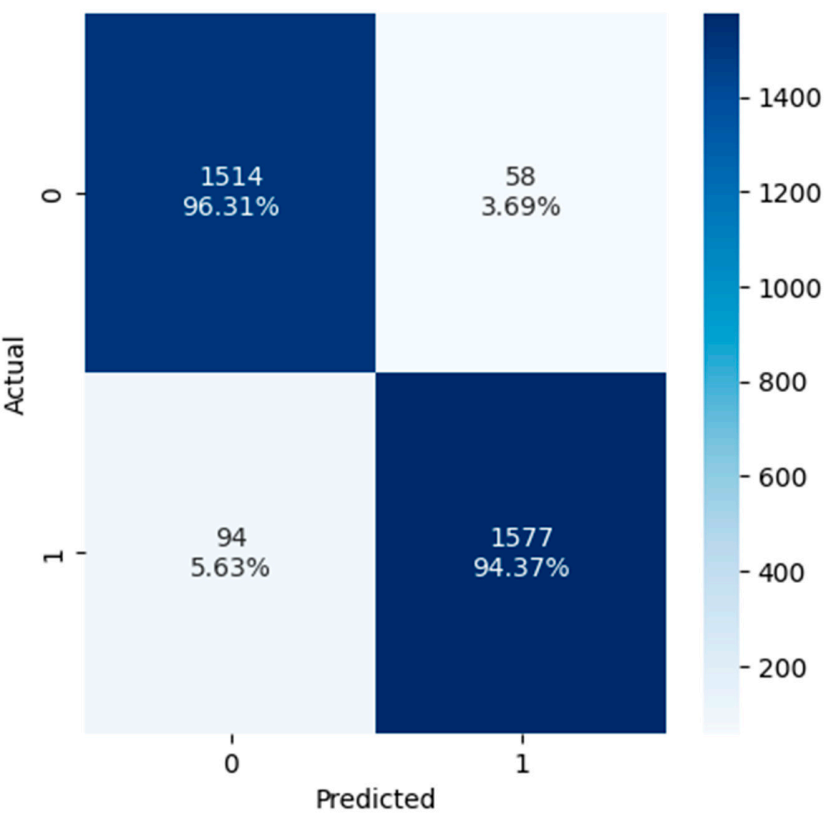

Figure S9: Confusion matrix of Self-ResAttentionNet18\_Q3 model

The ROC curve of Self-ResAttentionNet18\_Q3 model is given in Figure 10 below.

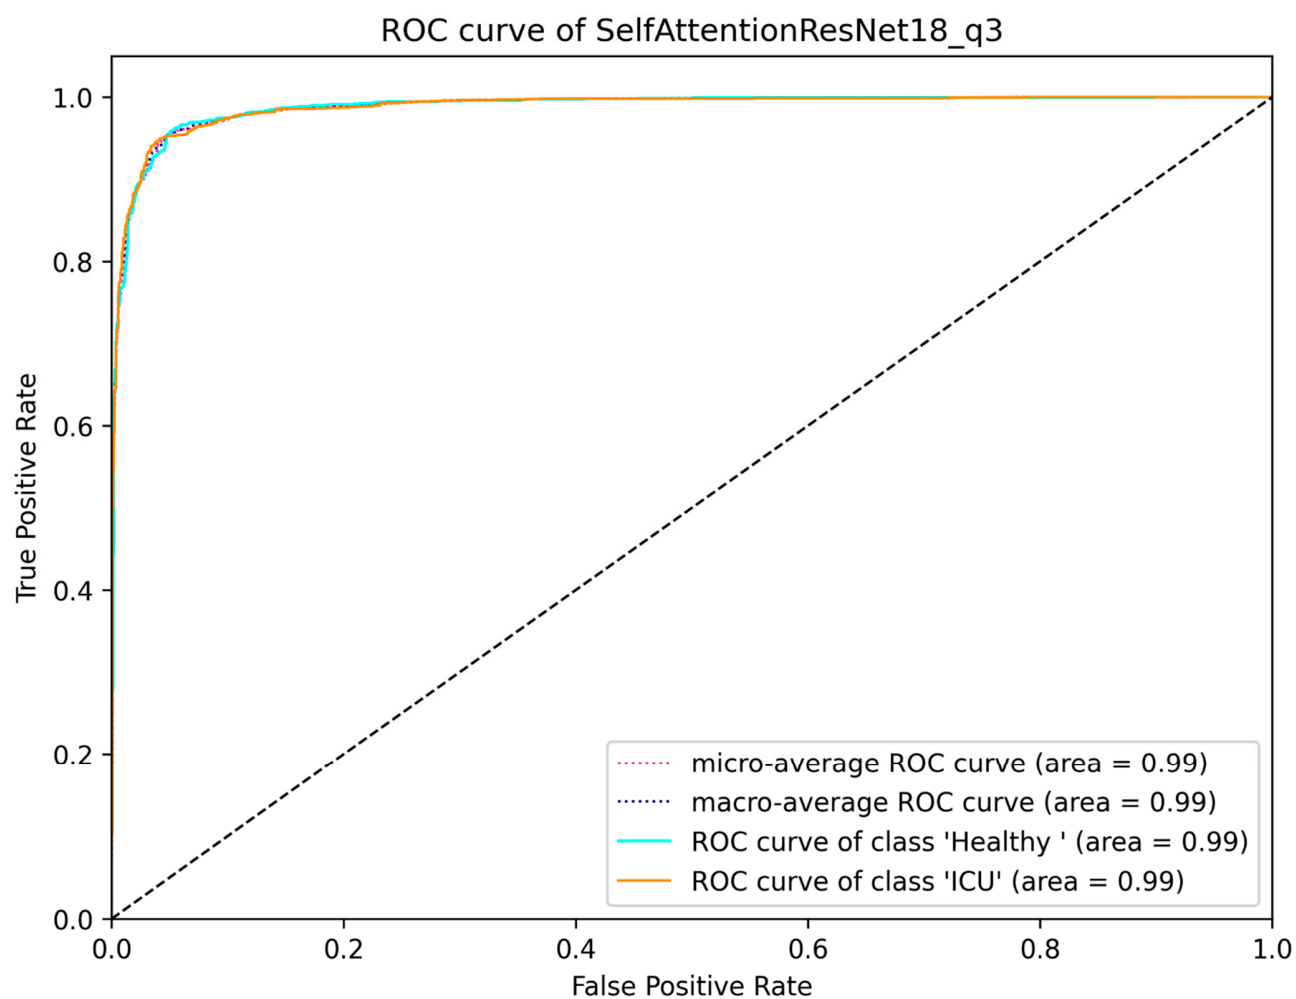

Figure S10: ROC curve of Self-ResAttentionNet18\_Q3 model

Self-ResAttentionNet18\_Q5 Model

Table S6: Fold-wise learning curves of the Self-ResAttentionNet18\_Q5 model

| Fold | Accuracy Curve                                                                      | Loss Curve                                                                           |
|------|-------------------------------------------------------------------------------------|--------------------------------------------------------------------------------------|
| 1    | 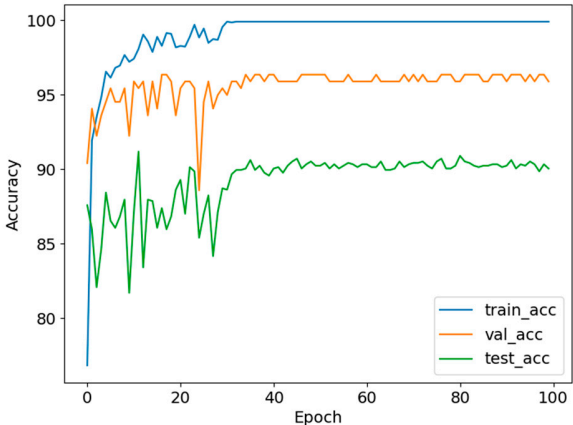   |    |
| 2    |  |  |
| 3    |  |  |

4

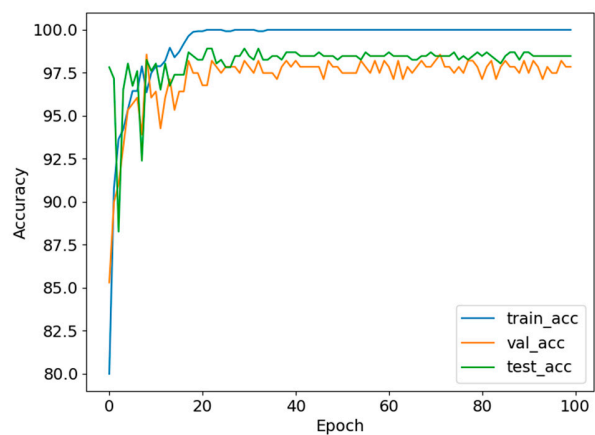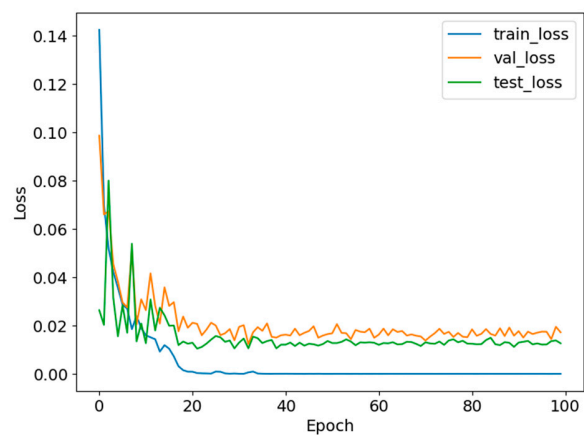

5

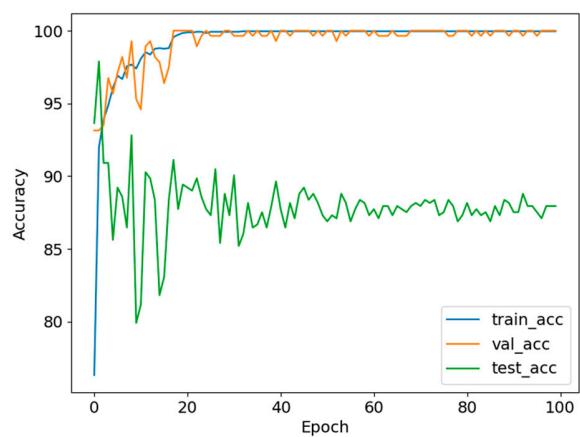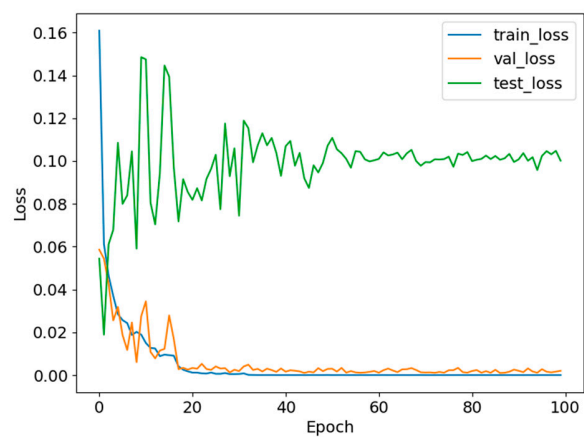

The confusion matrix of Self-ResAttentionNet18\_Q5 model is given in Figure 11.

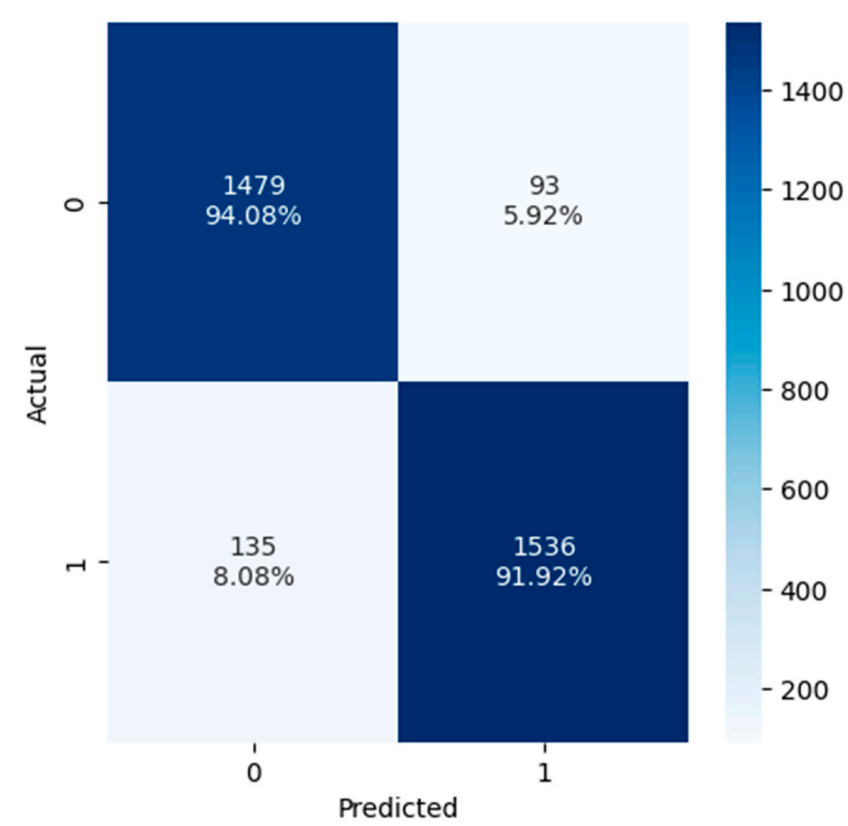

Figure S11: Confusion matrix of Self-ResAttentionNet18\_Q5 model

The ROC curve of Self-ResAttentionNet18\_Q5 model is given in Figure 12 below.

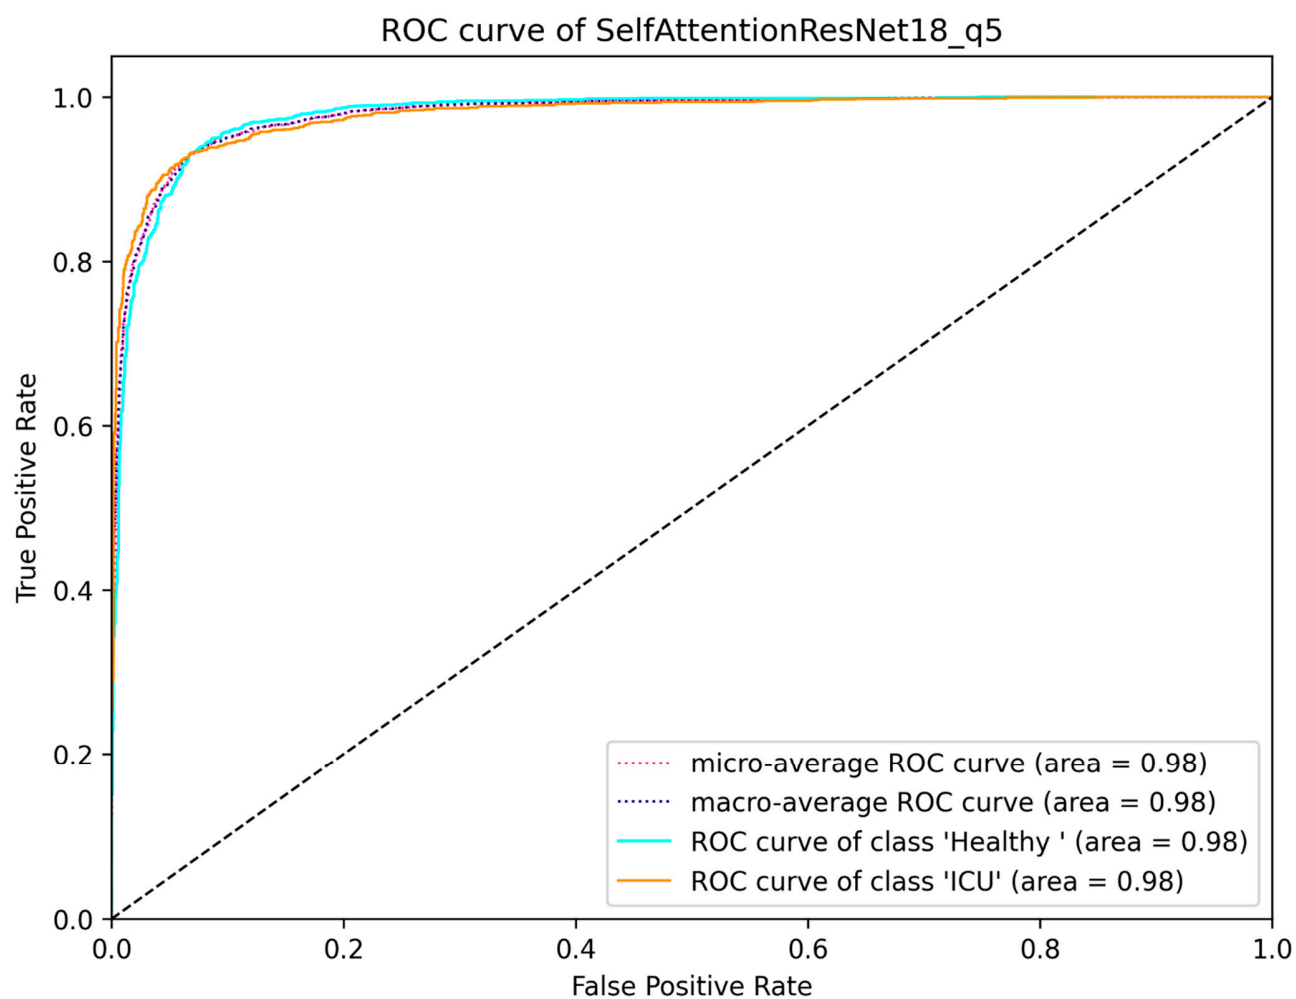

Figure S12: ROC curve of Self-ResAttentionNet18\_Q5 model
